# Supplementary material
Source: publisher figshare collection journal article supplement (https://gsajournals.figshare.com/ndownloader/files/28348878)
Supplement: Supplementary file 1 [file 28348878]

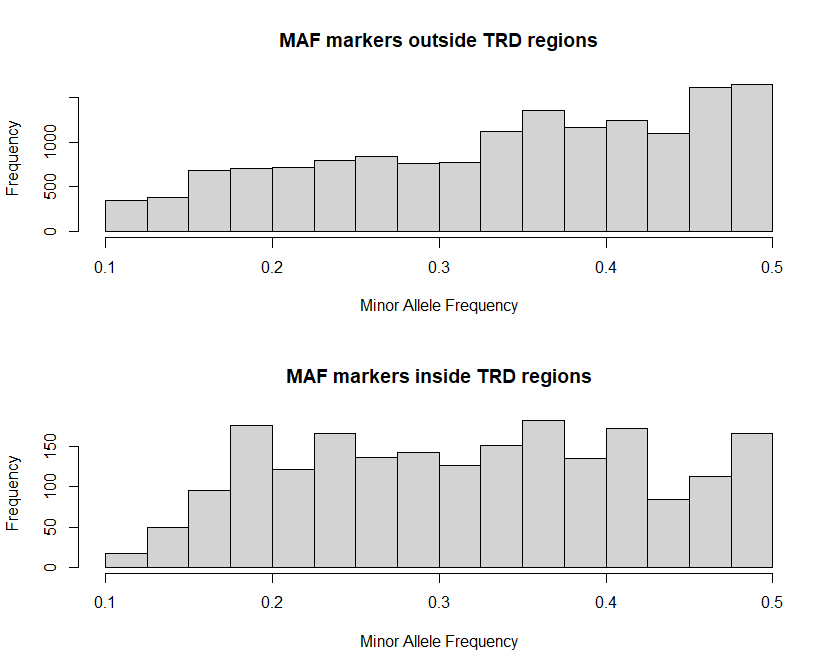


Minor allele frequency comparison of markers inside and outside of TRD regions. We observed that average allele frequencies are slightly but significantly (p(wilcox) < 1x10-16) reduced for markers inside TRD regions (0.319) compared to markers outside of TRD regions (0.342)


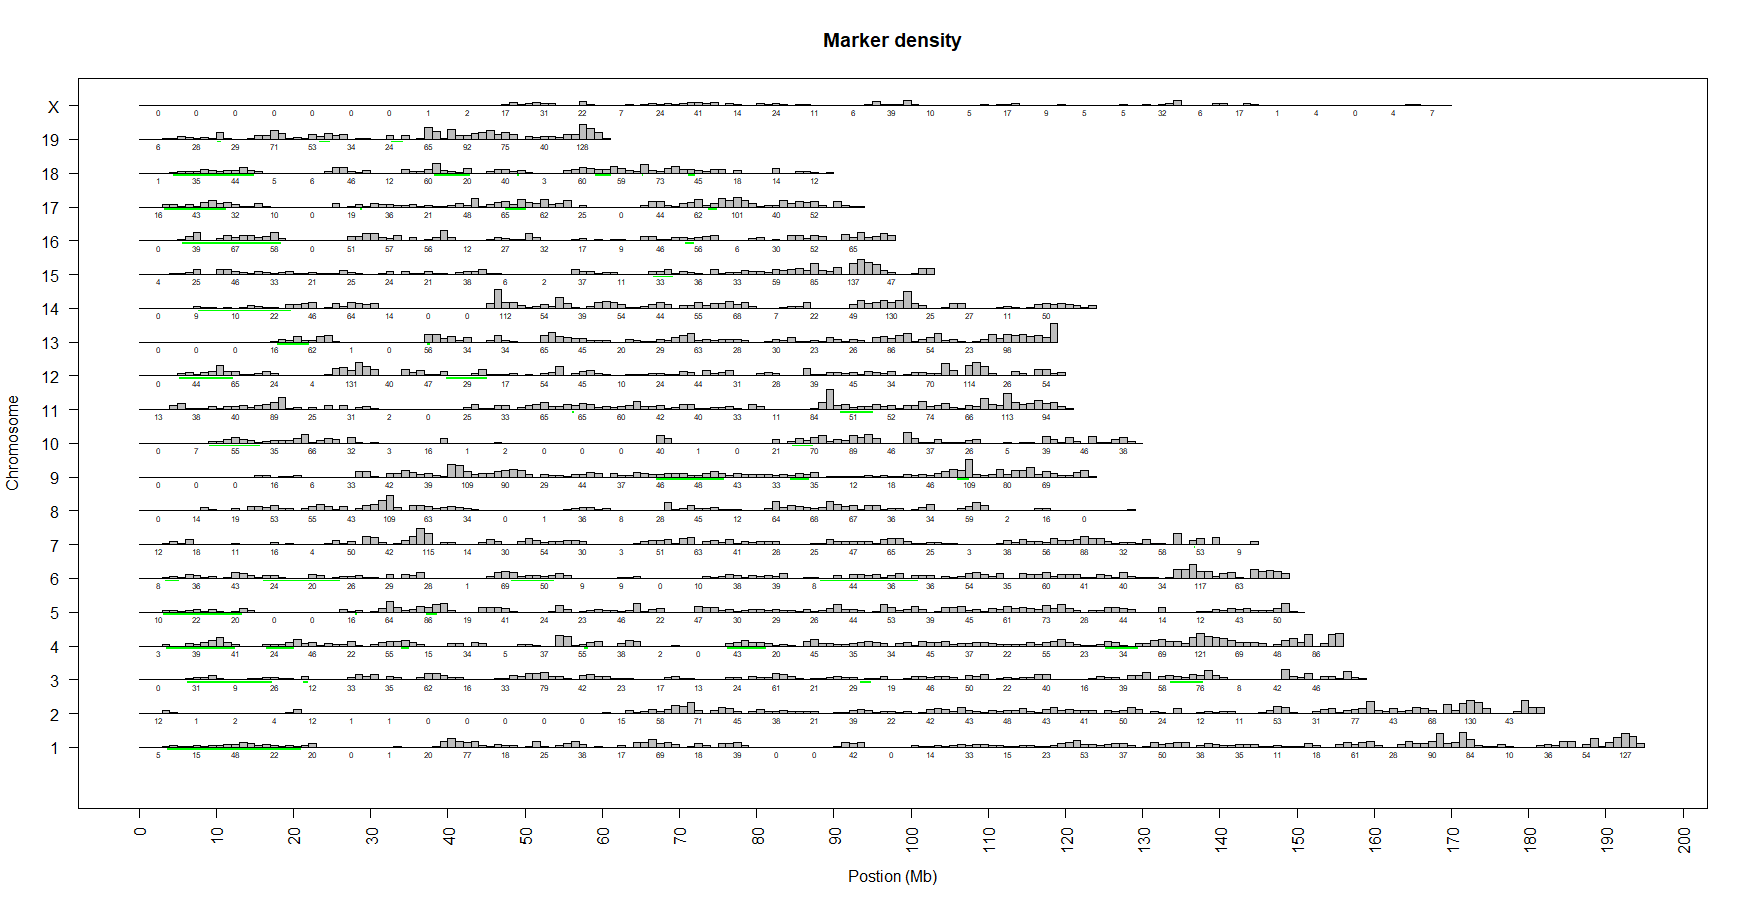


SNP marker density of SNPs at which TRD testing is possible across the genome using a window of 500kb, every 5 Mb, starting at 2.5 Mb the number of SNP markers in a 5Mb window is shown underneath. Green regions are regions for which TRD was detected.
